# Supplementary material for: Comparative analysis of the autism-related variants between different autistic children in a family pedigree
Source: PubMed Central journal article supplement — Mol Med Rep. 2021 Aug 3;24(4):697. doi: 10.3892/mmr.2021.12336 (PMC8365409; doi:10.3892/mmr.2021.12336), 2021-08-03
Supplement: Supplementary_Data.pdf [file Supplementary_Data.pdf]

Table SI. Sequences of PCR primers.

| Gene name     | Primer sequence (5' to 3') |
|---------------|----------------------------|
| DNAH7-E18-F   | TGGCTACCATCTGTATATCCTCA    |
| DNAH7-E18-R   | GCTGCTTCACTAATACCTTCAAA    |
| CAPN10-E7-F   | GGAGGAGGGTGATGATTCTGT      |
| CAPN10-E7-R   | GAGCCAGTCCTAGAACCCAG       |
| LPA-E34-F     | TCTTCTCCCTCTCCTGCTCC       |
| LPA-E34-R     | AAGGGTTCGGTGGGACTATC       |
| ABCB5-E12-F   | CAGGATTGGCGTCTTAACACA      |
| ABCB5-E12-R   | TGGTCTGTATGCATTTCTCTCTC    |
| LAMB1-E3-F    | GTGGGTTTTCTTTCCGTGTCC      |
| LAMB1-E3-R    | TACAGTAGGGTTCGGGCTTG       |
| CTTNBP2-E5-F  | TGTCTCTTGTCTTGCTCCT        |
| CTTNBP2-E5-R  | TGGGCTTTTGACTTTCCATCC      |
| ZNF79-E5-F1   | CCACCAAGGGAACACAACAG       |
| ZNF79-E5-R1   | CCTTCCCACATTCCTGCTGCAC     |
| LAMC3-E15-F   | ATCTCCTCTGCCTCTGTTGG       |
| LAMC3-E15-R   | TGCCAAGAGTCCATCCCTTT       |
| JMJD1C-E6-F   | TCGTCAGAACAGTCCACAGT       |
| JMJD1C-E6-R   | CAACTTCAGGTGATGGGCTG       |
| SCUBE2-E7-F   | ACCGTGCTCTTTTGCTTCTC       |
| SCUBE2-E7-R   | GGTCTTGCTTGGTTGGTGAT       |
| GPR152-E1-F   | CAGAGGCCAGTCACAGATG        |
| GPR152-E1-R   | CTTCAGAGGCAGGAGGTGTG       |
| OAS3-E9-F     | TTCCTGCCCAAGTGCTTAT        |
| OAS3-E9-R     | AGAGTGAGGAGTGGGATTGC       |
| MYCBP2-E50-F  | CCTTGACATCCTGAGACATTCC     |
| MYCBP2-E50-R  | TGAAGCATCAGTGACAAACGT      |
| CACNA1H-E25-F | GTTTCGTGCTGTCATCCAAGG      |
| CACNA1H-E25-R | CTTACTCCTGCGCCTCCTC        |
| CHD3-E11-F    | TCCCTTTCCCTGTCCCATC        |
| CHD3-E11-R    | TCCTCCTGTTTTCTCCCGTT       |
| MYH4-E4-F     | CGAAGCTGGAGCTGTGAGTAA      |
| MYH4-E4-R     | AGCGTTGAAAGGGTGCTCA        |
| ARHGEF6-E12-F | TGTGGTGACTTCTCAGGCTT       |
| ARHGEF6-E12-R | TCATCCGAGGACTTGCAGAT       |
| ATP2B4-E12-F  | ATGGTACGCACTGTCATCGA       |
| ATP2B4-E12-R  | TGAGCCCAATAAGCCCTTTG       |
| NRP2-E9-F     | CAGGCTCTTAACCACAGTGC       |
| NRP2-E9-R     | TACCTGAAGCCACTCCTCAC       |
| CSMD1-E41-F   | GAGAGGGATTGTCTGGGGAG       |
| CSMD1-E41-R   | CGGTTCTCGTTGTTGTTCCA       |
| SORCS1-E1-F   | TAAGAGATGGAGGGCAGCAG       |
| SORCS1-E1-R   | GATGGTGTGGTGGGAGAGA        |
| USH2A-E13-F   | ATCTGCAAGCCCAATGTTGA       |
| USH2A-E13-R   | CCACAAACCAGAAACAGGGAG      |
| SNTG2-E3-F    | CAGACAATGCCTGGAATGGG       |
| SNTG2-E3-R    | GCCATCAGAAAGAAACGTGGT      |
| SCN1A-E10-F   | AGCCATGCAAATACTTCAGCC      |
| SCN1A-E10-R   | TTCTCCTGATGCTGTCCTC        |
| SETD5-E20-F   | GGGTTGGTGTCTGCTTTGTT       |
| SETD5-E20-R   | CCTCTGGAATCTGATGGGCT       |
| CCDC14-E5-F   | GGCCTCTACCATCACAAGCT       |
| CCDC14-E5-R   | AGCAACAGACTTCATACTTCCT     |
| ROS1-E43-F    | TCTGCTTCCCTGCTAGACTG       |
| ROS1-E43-R    | TGTCTGCATGTGGTTCCTTC       |
| SYNE1-E72-F   | TGCAGGCAATGATGGAAGAAATT    |
| SYNE1-E72-R   | CAACACACCAAACGAATCCAAA     |
| THSD7A-E24-F  | GCCTGGAGTCACTACATAAGGT     |
| THSD7A-E24-R  | TGCATAAGAGACAGTGGGGT       |

Table SI. Continued.

| Gene name     | Primer sequence (5' to 3') |
|---------------|----------------------------|
| PLXNA4-E31-F  | CCAGCAACCCAGATGAGAGA       |
| PLXNA4-E31-R  | AGAGGTGGATGTGTCTGTGG       |
| CHD7-E3-F     | ACCGAATGCTCAGCTAGTGA       |
| CHD7-E3-R     | CCCACAGCCTACCTTGACTT       |
| PKHD1L1-E77-F | TCCAGAACTTTCAGCCTGCT       |
| PKHD1L1-E77-R | CCAGCCTTGTTTCACCACAT       |
| KCNMA1-E1-F   | TGGCTGTTGATGGGTGTTTG       |
| KCNMA1-E1-R   | GCAAGATGATGAAGAGGCC        |
| SLK-E12-F     | AGCGACAATATGACCAGGAAA      |
| SLK-E12-R     | TGACTGTTGAGAAGACCGAATG     |
| NAV2-E5-F     | GCACCTACCAGACATCCAGT       |
| NAV2-E5-R     | GCCTAGAGATTGGTTGGGGT       |
| NCAPD2-E20-F  | CTGTACACACACCCACGTTG       |
| NCAPD2-E20-R  | TCTTCTAGCTTCTCCAGGGC       |
| SMARCC2-E26-F | CAGACAAGCCTTCCACATGG       |
| SMARCC2-E26-R | CACCTGGATTCTCTAGCCA        |
| GOLGA3-E12-F  | CACATTCCCCTCCTATAGTCCT     |
| GOLGA3-E12-R  | TTTCAGAGCAGCAGTCTCCT       |
| SPATA13-E2-F  | AGTCCACCTCCAATCTTGCA       |
| SPATA13-E2-R  | GAAGTGTGCTTTCCACCG         |
| MTMR12-E5-F   | GCTTCCTTTGGCAGTCACTT       |
| MTMR12-E5-R   | CCGCCTACTGACCTGGTTTA       |
| DNAH9-E15-F   | TCCATCAAAGGCTGCTGAGA       |
| DNAH9-E15-R   | TTCACCCACCTGTCCCTCTA       |

E, exon; F, forward; R, reverse.
